# Supplementary material for: Metabolomics Test Materials for Quality Control: A Study of a Urine Materials Suite
Source: MDPI journal article supplement (doi:10.3390/metabo9110270), 2019-11-07
Supplement: s1 [file s1]

Table S2. Tentative Peak Identifications for GC/MS of SRM 3667 Creatinine in Frozen Human Urine

| Peak # | Retention Time (min) | Scan number | Peak Area | Tentative Identification                                                        | Match Score |
|--------|----------------------|-------------|-----------|---------------------------------------------------------------------------------|-------------|
| 1      | 7.95                 | 841         | 77506279  | Glycine, 3TMS derivative                                                        | 920         |
| 2      | 8.035                | 867         | 16248724  | Butanedioic acid, 2TMS derivative                                               | 973         |
| 3      | 8.274                | 937         | 46959124  | Glyceric acid, 3TMS derivative                                                  | 969         |
| 4      | 8.561                | 1021        | 31924853  | (R*,R*)-2,3-Dihydroxybutanoic acid, tris(trimethylsilyl)-                       | 954         |
| 5      | 8.775                | 1083        | 56109336  | R*,R*)-2,3-Dihydroxybutanoic acid, tris(trimethylsilyl)-                        | 963         |
| 6      | 8.978                | 1143        | 23983222  | Serine, 3TMS derivative                                                         | 924         |
| 7      | 10.215               | 1508        | 15038993  | 4-Methoxy-2-[(trimethylsilyl)oxy]phenyl}{2-[(trimethylsilyl)oxy]phenyl}methanon | 762         |
| 8      | 10.281               | 1527        | 20924507  | Butanoic acid, 2,4-bis[(trimethylsilyl)oxy]-, trimethylsilyl ester              | 925         |
| 9      | 10.82                | 1685        | 42703023  | Butanoic acid, 3,4-bis[(trimethylsilyl)oxy]-, trimethylsilyl ester              | 951         |
| 10     | 11.116               | 1771        | 44073604  | ????                                                                            |             |
| 11     | 11.956               | 2019        | 46295770  | Aminomalonic acid, tris(trimethylsilyl)-                                        | 933         |
| 12     | 12.72                | 2244        | 42916312  | meso-Erythritol, 4TMS derivative                                                | 939         |
| 13     | 12.981               | 2321        | 213761026 | meso-Erythritol, 4TMS derivative                                                | 954         |
| 14     | 13.257               | 2402        | 20223178  | Salicylic acid, 2TMS derivative                                                 | 906         |
| 15     | 13.6                 | 2502        | 62630709  | L-5-Oxoproline, , 2TMS derivative                                               | 950         |
| 16     | 13.986               | 2616        | 350987490 | ????                                                                            |             |
| 17     | 14.096               | 2648        | 174508721 | L-Threonic acid, tris(trimethylsilyl) ether, trimethylsilyl ester               | 936         |
| 18     | 14.605               | 2798        | 175659506 | L-Threonic acid, tris(trimethylsilyl) ether, trimethylsilyl ester               | 828         |
| 19     | 15.176               | 2965        | 42336481  | Sebacic acid, di(4-octyl) ester                                                 | 839         |
| 20     | 15.651               | 3106        | 88667492  | 1,2-Dithiane-4,5-diol, (Z)-, 2TMS derivative                                    | 945         |
| 21     | 16.488               | 3352        | 30467457  | ????                                                                            |             |
| 22     | 16.826               | 3451        | 19966999  | ????                                                                            |             |
| 23     | 17.137               | 3542        | 126251068 | Tartaric acid, 4TMS derivative                                                  | 920         |
| 24     | 17.378               | 3614        | 36125871  | 4-Hydroxybenzeneacetic acid, 2TMS derivative                                    | 923         |
| 25     | 17.516               | 3653        | 20634001  | 2-Butenedioic acid, (E)-, 2TMS derivative                                       | 860         |
| 26     | 17.726               | 3715        | 36704913  | D-Arabinose, tetrakis(trimethylsilyl) ether, ethyloxime (isomer 2)              | 903         |
| 27     | 17.847               | 3751        | 123902002 | 3,4,5-Trihydroxypentanoic acid, tetrakis(trimethylsilyl)-                       | 938         |
| 28     | 17.955               | 3783        | 75036175  | DL-Arabinose, tetrakis(trimethylsilyl) ether, methyloxime                       | 895         |

| Peak # | Retention Time (min) | Scan number | Peak Area  | Tentative Identification                                                 | Match Score |
|--------|----------------------|-------------|------------|--------------------------------------------------------------------------|-------------|
| 30     | 18.431               | 3922        | 35782188   | D-Arabinose, tetrakis(trimethylsilyl) ether, ethyloxime (isomer 1)       | 828         |
| 31     | 19.246               | 4162        | 23285216   | ????                                                                     |             |
| 32     | 19.339               | 4190        | 110051963  | Levogluconan, 3TMS derivative                                            | 924         |
| 33     | 19.856               | 4342        | 109951628  | D-(+)-Arabitol, 5TMS derivative                                          | 957         |
| 34     | 20.022               | 4382        | 63235257   | L-Fucitol, 5TMS derivative                                               | 831         |
| 35     | 20.96                | 4667        | 81586284   | Aconitic acid, (Z)-, 3TMS derivative                                     | 950         |
| 36     | 21.321               | 4772        | 49574602   | Ribonic acid, 2,3,4,5-tetrakis-O-(trimethylsilyl)-, trimethylsilyl ester | 903         |
| 37     | 21.647               | 4867        | 21331946   | Ribonic acid, 2,3,4,5-tetrakis-O-(trimethylsilyl)-, trimethylsilyl ester | 867         |
| 38     | 21.921               | 4948        | 93084470   | -(-)-Tagatose, pentakis(trimethylsilyl) ether, methyloxime (anti)        | 783         |
| 39     | 22.357               | 5079        | 17481598   | ????                                                                     |             |
| 40     | 22.789               | 5205        | 20213817   | 9H-Purin-6-ol, 2TMS derivative                                           | 807         |
| 41     | 23.011               | 5270        | 48462005   | ????                                                                     |             |
| 42     | 23.302               | 5325        | 714280064  | Citric acid, 4TMS derivative                                             | 943         |
| 43     | 23.84                | 5514        | 33702117   | 2,4-Dimethoxyphenylpyruvic acid, di-TMS                                  | 840         |
| 44     | 24.277               | 5584        | 661992223  | Glycine, N-benzoyl-, trimethylsilyl ester                                | 951         |
| 45     | 24.38                | 5670        | 67539566   | D-Fructose, 1,3,4,5,6-pentakis-O-(trimethylsilyl)-, O-methyloxime        | 931         |
| 46     | 24.458               | 5695        | 79429223   | Quinic acid (5TMS)                                                       | 861         |
| 47     | 24.589               | 5733        | 138763915  | L-3-Methylhistidine, 2TMS derivative                                     | 890         |
| 48     | 24.755               | 5783        | 125662400  | D-Psicose, pentakis(trimethylsilyl) ether, methyloxime (syn)             | 921         |
| 49     | 24.881               | 5819        | 56359320   | D-Fructose, 1,3,4,5,6-pentakis-O-(trimethylsilyl)-, O-methyloxime        | 971         |
| 50     | 25.103               | 5884        | 50416689   | -Glucose, 2,3,4,5,6-pentakis-O-(trimethylsilyl)-, o-methyloxime, (1E)    | 810         |
| 51     | 25.201               | 5915        | 43864426   | D-Fructose, 1,3,4,5,6-pentakis-O-(trimethylsilyl)-, O-methyloxime        | 922         |
| 52     | 25.33                | 5952        | 56380523   | Gluconolactone (3R,4S,5R,6R)-, 4TMS derivative                           | 804         |
| 53     | 25.597               | 6028        | 193690947  | D-Mannose, 5TMS derivative                                               | 818         |
| 54     | 25.774               | 6055        | 1491164280 | -Glucose, 2,3,4,5,6-pentakis-O-(trimethylsilyl)-, o-methyloxime, (1E)    | 928         |
| 55     | 26.12                | 6184        | 21430575   | $\beta$ -D-Xylopyranose, 4TMS derivative                                 | 859         |
| 56     | 26.362               | 6238        | 570828144  | Galactose, 2,3,4,5,6-pentakis-O-(trimethylsilyl)-, o-methyloxime, (1Z)   | 933         |
| 57     | 26.511               | 6304        | 99090584   | L-Histidine, N,1-bis(trimethylsilyl)-, trimethylsilyl ester              | 875         |
| 58     | 26.758               | 6370        | 418959126  | D-Mannitol, 6TMS derivative                                              | 961         |
| 59     | 26.935               | 6423        | 214300753  | Galactaric acid, 6TMS derivative                                         | 848         |

| Peak # | Retention Time (min) | Scan number | Peak Area | Tentative Identification                                                              | Match Score |
|--------|----------------------|-------------|-----------|---------------------------------------------------------------------------------------|-------------|
| 60     | 27.124               | 6479        | 56605938  | L-Tyrosine, 3TMS derivative                                                           | 953         |
| 61     | 27.39                | 6556        | 51785324  | Galactaric acid, 6TMS derivative                                                      | 894         |
| 62     | 27.659               | 6635        | 35040390  | 3- $\alpha$ -Mannobiose, octakis(trimethylsilyl) ether (isomer 2)                     | 829         |
| 63     | 27.73                | 6657        | 27301858  | 13 $\beta$ -Ethyl-3-oximinogon-4-en-17-one 3-TMS                                      | 846         |
| 64     | 27.901               | 6707        | 26082532  | D-Gluconic acid, 6TMS derivative                                                      | 948         |
| 65     | 28.402               | 6853        | 442698384 | $\beta$ -D-Glucopyranose, 5TMS derivative                                             | 938         |
| 66     | 28.823               | 6978        | 45650469  | D-Gluconic acid, 6TMS derivative                                                      | 858         |
| 67     | 28.94                | 7013        | 86669842  | D-Gluconic acid, 6TMS derivative                                                      | 965         |
| 68     | 29.268               | 7109        | 23495967  | ????                                                                                  |             |
| 69     | 29.577               | 7200        | 19605243  | 9H-Purine, 9-(trimethylsilyl)-2,6-bis[(trimethylsilyl)oxy]-                           | 869         |
| 70     | 29.702               | 7235        | 20242911  | Glucuronic acid, 2,3,4,5-tetrakis-O-(trimethylsilyl)-, trimethylsilyl est             | 930         |
| 71     | 29.791               | 7264        | 17204900  | Inositol, 1,2,3,4,5,6-hexakis-O-(trimethylsilyl)-, scyllo-                            | 859         |
| 72     | 29.901               | 7295        | 53525187  | ????                                                                                  |             |
| 73     | 30.095               | 7351        | 22284608  | 7-Methylxanthine, 2TMS derivative                                                     | 903         |
| 74     | 31.107               | 7638        | 154554047 | 2-Hydroxyhippuric acid, 2TMS derivative                                               | 949         |
| 75     | 31.703               | 7824        | 42919839  | Myo-Inositol, 6TMS derivative                                                         | 922         |
| 76     | 32.18                | 7943        | 405544994 | Uric acid, N,O,O',O''-tetrakis(trimethylsilyl)-                                       | 864         |
| 77     | 33.532               | 8362        | 27566934  | Glycine, N-[4-[(trimethylsilyl)oxy]benzoyl]-, trimethylsilyl ester                    | 925         |
| 78     | 35.282               | 8875        | 24105189  | ????                                                                                  |             |
| 79     | 35.406               | 8913        | 41233803  | ????                                                                                  |             |
| 80     | 35.839               | 9040        | 44910783  | Glycine, N-[4-[(trimethylsilyl)oxy]benzoyl]-, trimethylsilyl ester                    | 936         |
| 81     | 38.901               | 9940        | 138973495 | D-(-)-Lyxofuranose, tetrakis(trimethylsilyl) ether                                    | 877         |
| 82     | 40.455               | 10398       | 29460668  | D-(-)-Ribofuranose, tetrakis(trimethylsilyl) ether (isomer 1)                         | 849         |
| 83     | 41.349               | 10661       | 73636763  | Ethylenediaminetetraacetic acid, tetrakis(trimethylsilyl) ester                       | 897         |
| 84     | 42.557               | 11012       | 60859875  | ????                                                                                  |             |
| 85     | 43.22                | 11208       | 41900734  | ????                                                                                  |             |
| 86     | 54.25                | 14456       | 25570480  | ????                                                                                  |             |
| 87     | 55.488               | 14777       | 524712609 | Glucopyranosiduronic acid, 4-(acetyl amino)phenyl 2,3,4-tris-O-(trimethylsilyl) ester | 874         |
| 88     | 56.245               | 15041       | 33467022  | ????                                                                                  |             |

Table S3. Tentative Peak Identifications for GC/MS of SRM 3672 Smoker's Urine

| Peak # | Retention Time (min) | Scan number | Peak Area | Tentative Identification                                              | Match Score |
|--------|----------------------|-------------|-----------|-----------------------------------------------------------------------|-------------|
| 1      | 7.953                | 840         | 90868556  | Glycine, 3TMS derivative                                              | 921         |
| 2      | 8.048                | 866         | 48824503  | Butanedioic acid, 2TMS derivative                                     | 947         |
| 3      | 8.27                 | 936         | 38749069  | Glyceric acid, 3TMS derivative                                        | 956         |
| 4      | 8.56                 | 1021        | 33206969  | (R*,R*)-2,3-Dihydroxybutanoic acid, tris(trimethylsilyl)-             | 956         |
| 5      | 8.783                | 1082        | 51891440  | Trimethylsilyl 2,3-bis[(trimethylsilyl)oxy]butanoate                  | 959         |
| 6      | 8.977                | 1143        | 24133774  | Serine, 3TMS derivative                                               | 921         |
| 7      | 9.604                | 1328        | 16585429  | L-Threonine, 3TMS derivative                                          | 959         |
| 8      | 10.212               | 1506        | 19551777  | ????                                                                  |             |
| 9      | 10.283               | 1527        | 23005744  | Butanoic acid, 2,4-bis[(trimethylsilyl)oxy]-, trimethylsilyl ester    | 925         |
| 10     | 10.83                | 1686        | 63773360  | (R*,S*)-3,4-DIHYDROXYBUTANOIC ACID TRITMS                             | 942         |
| 11     | 11.114               | 1771        | 23083169  | ????                                                                  |             |
| 12     | 11.966               | 2020        | 47877587  | Aminomalonic acid, tris(trimethylsilyl)-                              | 941         |
| 13     | 12.727               | 2245        | 47033961  | L-Threitol, 4TMS derivative                                           | 932         |
| 14     | 12.997               | 2324        | 320193317 | meso-Erythritol, 4TMS derivative                                      | 960         |
| 15     | 13.628               | 2505        | 99413228  | L-5-Oxoproline, , 2TMS derivative                                     | 953         |
| 16     | 13.801               | 2560        | 16805026  | ????                                                                  |             |
| 17     | 13.967               | 2610        | 209664965 | ????                                                                  |             |
| 18     | 14.097               | 2649        | 170202400 | L-Threonic acid, tris(trimethylsilyl) ether, trimethylsilyl ester     | 940         |
| 19     | 14.606               | 2800        | 85144065  | Erythronic acid, tetrakis(trimethylsilyl) deriv                       | 937         |
| 20     | 15.177               | 2967        | 25004451  | Pentanedioic acid, 2-[(trimethylsilyl)oxy]-, bis(trimethylsilyl) es   | 963         |
| 21     | 15.655               | 3106        | 93148201  | 1,2-Dithiane-4,5-diol, (Z)-, 2TMS derivative                          | 945         |
| 22     | 16.493               | 3353        | 23881138  | ????                                                                  |             |
| 23     | 16.9                 | 3473        | 22066238  | Pentanedioic acid, 2-[(trimethylsilyl)oxy]-, bis(trimethylsilyl) es   | 887         |
| 24     | 17.12                | 3536        | 18665207  | ????                                                                  |             |
| 25     | 17.377               | 3613        | 44993306  | 4-Hydroxybenzeneacetic acid, 2TMS derivative                          | 935         |
| 26     | 17.515               | 3653        | 21418462  | Pentonic acid, 3-deoxy-2,4,5-tris-O-(trimethylsilyl)-, trimethylsilyl | 781         |
| 27     | 17.725               | 3716        | 50344372  | D-Arabinose, tetrakis(trimethylsilyl) ether, ethyloxime (isomer       | 908         |
| 28     | 17.843               | 3751        | 88572747  | 3,4,5-Trihydroxypentanoic acid, tetrakis(trimethylsilyl)-             | 921         |
| 29     | 17.951               | 3783        | 88210856  | D-Arabinose, tetrakis(trimethylsilyl) ether, ethyloxime (isomer       | 897         |
| 30     | 18.025               | 3804        | 25403011  | Furoylglycine, TMS derivative                                         | 852         |
| 31     | 18.103               | 3826        | 25797177  | Pentonic acid, 3-deoxy-2,4,5-tris-O-(trimethylsilyl)-, trimethylsilyl | 782         |
| 32     | 18.439               | 3909        | 38728523  | ????                                                                  |             |
| 33     | 19.255               | 4165        | 31670078  | ????                                                                  |             |

| Peak # | Retention Time (min) | Scan number | Peak Area | Tentative Identification                                               | Match Score |
|--------|----------------------|-------------|-----------|------------------------------------------------------------------------|-------------|
| 35     | 19.857               | 4343        | 123935152 | D-(+)-Arabitol, 5TMS derivative                                        | 949         |
| 36     | 20.023               | 4393        | 84355069  | L-Fucitol, 5TMS derivative                                             | 824         |
| 37     | 20.542               | 4543        | 15213911  | ????                                                                   |             |
| 38     | 20.961               | 4668        | 67194046  | 1-Propene-1,2,3-tricarboxylic acid, tris(trimethylsilyl) ester, (Z)    | 934         |
| 39     | 21.335               | 4775        | 54340576  | Ribonic acid, 2,3,4,5-tetrakis-O-(trimethylsilyl)-, trimethylsilyl e   | 880         |
| 40     | 21.653               | 4869        | 26109192  | 2-Keto-l-gluconic acid, penta(O-trimethylsilyl)-                       | 823         |
| 41     | 21.925               | 4949        | 71739374  | ????                                                                   |             |
| 42     | 22.359               | 5076        | 20708554  | ????                                                                   |             |
| 43     | 22.774               | 5201        | 17252963  | ????                                                                   |             |
| 44     | 22.934               | 5246        | 34831097  | D-(-)-Fructofuranose, pentakis(trimethylsilyl) ether (isomer 2         | 857         |
| 45     | 23.01                | 5268        | 25414736  | ????                                                                   |             |
| 46     | 23.298               | 5351        | 607114235 | Citric acid, 4TMS derivative                                           | 929         |
| 47     | 24.259               | 5631        | 352157419 | Glycine, N-benzoyl-, trimethylsilyl ester                              | 960         |
| 48     | 24.453               | 5695        | 120328651 | Quinic acid (5TMS)                                                     | 899         |
| 49     | 24.575               | 5730        | 131382002 | ????                                                                   |             |
| 50     | 24.749               | 5782        | 101162405 | D-Psicose, pentakis(trimethylsilyl) ether, methyloxime (syn)           | 912         |
| 51     | 24.883               | 5819        | 59808795  | D-(-)-Fructose, pentakis(trimethylsilyl) ether, methyloxime (an        | 899         |
| 52     | 25.101               | 5884        | 54421559  | d-Glucose, 2,3,4,5,6-pentakis-O-(trimethylsilyl)-, o-methyloxyme,      | 868         |
| 53     | 25.199               | 5912        | 44424139  | D-(-)-Fructose, pentakis(trimethylsilyl) ether, methyloxime (sy        | 883         |
| 54     | 25.322               | 5948        | 95313010  | ????                                                                   |             |
| 55     | 25.48                | 5995        | 48508343  | d-Galactose, 2,3,4,5,6-pentakis-O-(trimethylsilyl)-, o-methyloxy (1E)- | 871         |
| 56     | 25.587               | 6027        | 198437665 | Galactopyranose, 5TMS derivative                                       | 927         |
| 57     | 25.756               | 6080        | 770863546 | d-Glucose, 2,3,4,5,6-pentakis-O-(trimethylsilyl)-, o-methyloxyme,      | 912         |
| 58     | 26.297               | 6239        | 200937419 | d-Glucose, 2,3,4,5,6-pentakis-O-(trimethylsilyl)-, o-methyloxyme,      | 933         |
| 59     | 26.475               | 6288        | 79752870  | L-Histidine, N,1-bis(trimethylsilyl)-, trimethylsilyl ester            | 903         |
| 60     | 26.584               | 6321        | 18901277  | L-Lysine, 4TMS derivative                                              | 859         |
| 61     | 26.726               | 6360        | 265046322 | D-Mannitol, 6TMS derivative                                            | 946         |
| 62     | 26.916               | 6416        | 205474954 | ????                                                                   |             |
| 63     | 27.116               | 6477        | 57656861  | L-Tyrosine, 3TMS derivative                                            | 921         |
| 64     | 27.383               | 6555        | 38324865  | Galactaric acid, 6TMS derivative                                       | 878         |
| 65     | 27.734               | 6658        | 62595302  | ????                                                                   |             |
| 66     | 27.903               | 6707        | 22858718  | D-Gluconic acid, 6TMS derivative                                       | 938         |
| 67     | 28.393               | 6849        | 352042836 | $\beta$ -D-Glucopyranose, 5TMS derivative                              | 943         |

| Peak # | Retention Time (min) | Scan number | Peak Area | Tentative Identification                                                                                       | Match Score |
|--------|----------------------|-------------|-----------|----------------------------------------------------------------------------------------------------------------|-------------|
| 68     | 28.94                | 7012        | 113869560 | D-Gluconic acid, 6TMS derivative                                                                               | 945         |
| 69     | 29.277               | 7113        | 62256369  | ????                                                                                                           |             |
| 70     | 29.701               | 7236        | 26306220  | D-Glucuronic acid, 2,3,4,5-tetrakis-O-(trimethylsilyl)-, trimethyl ester                                       | 952         |
| 71     | 29.902               | 7295        | 16304141  | ????                                                                                                           |             |
| 72     | 30.088               | 7350        | 20199838  | 7-Methylxanthine, 2TMS derivative                                                                              | 906         |
| 73     | 31.068               | 7638        | 30415572  | 2-Hydroxyhippuric acid, 2TMS derivative                                                                        | 966         |
| 74     | 31.346               | 7721        | 17454001  | N-Acetyl-D-glucosamine, tetrakis(trimethylsilyl) ether, methylox (syn)                                         | 845         |
| 75     | 31.704               | 7825        | 27080296  | Myo-Inositol, 6TMS derivative                                                                                  | 905         |
| 76     | 32.173               | 7962        | 382409992 | Uric acid, N,O,O',O''-tetrakis(trimethylsilyl)-                                                                | 851         |
| 77     | 33.537               | 8364        | 49596006  | Trimethylsilyl ((3-[(trimethylsilyl)oxy]benzoyl)amino)acetate                                                  | 915         |
| 78     | 35.282               | 8876        | 23739893  | ????                                                                                                           |             |
| 79     | 35.412               | 8915        | 24150640  | ????                                                                                                           |             |
| 80     | 35.853               | 9045        | 37033961  | Glycine, N-[4-[(trimethylsilyl)oxy]benzoyl]-, trimethylsilyl est                                               | 957         |
| 81     | 38.891               | 9944        | 107491800 | 1,4-Anhydro-1-(2,4-bis[(trimethylsilyl)oxy]-5-pyrimidinyl)-2,3,5-t (trimethylsilyl)pentitol                    | 822         |
| 82     | 40.455               | 10401       | 34695140  | D-(-)-Ribofuranose, tetrakis(trimethylsilyl) ether (isomer 1)                                                  | 859         |
| 83     | 41.351               | 10664       | 85193911  | Ethylenediaminetetraacetic acid, tetrakis(trimethylsilyl) ester                                                | 885         |
| 84     | 42.55                | 11015       | 59989182  | ????                                                                                                           |             |
| 85     | 43.205               | 11207       | 22714728  | ????                                                                                                           |             |
| 86     | 55.386               | 14794       | 88417551  | $\beta$ -d-Glucopyranosiduronic acid, 4-(acetylamino)phenyl 2,3,4-tris (trimethylsilyl)-, trimethylsilyl ester | 870         |

Table S4. Tentative Peak Identifications for GC/MS of SRM 3673 Non-Smoker's Urine

| Peak # | Retention Time (min) | Scan Number | Peak Area | Tentative Identification                                                 | Match Score |
|--------|----------------------|-------------|-----------|--------------------------------------------------------------------------|-------------|
| 1      | 7.952                | 840         | 38739069  | Glycine, 3TMS derivative                                                 | 946         |
| 2      | 8.038                | 868         | 10908014  | Butanedioic acid, 2TMS derivative                                        | 958         |
| 3      | 8.275                | 937         | 59547216  | Glyceric acid, 3TMS derivative                                           | 957         |
| 4      | 8.562                | 1021        | 27378969  | (R*,R*)-2,3-Dihydroxybutanoic acid, tris(trimethylsilyl)-                | 957         |
| 5      | 8.774                | 1084        | 49360071  | (R*,R*)-2,3-Dihydroxybutanoic acid, tris(trimethylsilyl)-                | 959         |
| 6      | 10.277               | 1526        | 39792967  | Butanoic acid, 2,4-bis[(trimethylsilyl)oxy]-, trimethylsilyl ester       | 897         |
| 7      | 10.815               | 1684        | 28951077  | Butanoic acid, 3,4-bis[(trimethylsilyl)oxy]-, trimethylsilyl ester       | 941         |
| 8      | 11.953               | 2018        | 49697227  | Aminomalonic acid, tris(trimethylsilyl)-                                 | 947         |
| 9      | 12.713               | 2242        | 29682104  | D-Threitol, 4TMS derivative                                              | 954         |
| 10     | 12.967               | 2315        | 135958914 | meso-Erythritol, 4TMS derivative                                         | 931         |
| 11     | 13.253               | 2400        | 22534743  | Salicylic acid, 2TMS derivative                                          | 893         |
| 12     | 13.595               | 2501        | 50650799  | L-5-Oxoproline, , 2TMS derivative                                        | 952         |
| 13     | 14.075               | 2641        | 120645355 | L-Threonic acid, tris(trimethylsilyl) ether, trimethylsilyl ester        | 932         |
| 14     | 14.375               | 2730        | 19596640  | ??                                                                       |             |
| 15     | 14.597               | 2795        | 109235662 | L-Threonic acid, tris(trimethylsilyl) ether, trimethylsilyl ester        | 930         |
| 16     | 15.208               | 2975        | 30067012  | Pentanedioic acid, 2-(methoxyimino)-, bis(trimethylsilyl) ester          | 858         |
| 17     | 15.641               | 3103        | 87866929  | 1,2-Dithiane-4,5-diol, (Z)-, 2TMS derivative                             | 953         |
| 18     | 16.479               | 3349        | 16399342  | ??                                                                       |             |
| 19     | 17.117               | 3537        | 33163372  | Tartaric acid, 4TMS derivative                                           | 914         |
| 20     | 17.715               | 3714        | 37080474  | D-Arabinose, tetrakis(trimethylsilyl) ether, ethyloxime (isomer 2)       | 895         |
| 21     | 17.832               | 3747        | 61051715  | 3,4,5-Trihydroxypentanoic acid, tetrakis(trimethylsilyl)-                | 919         |
| 22     | 17.952               | 3782        | 78864797  | D-Arabinose, tetrakis(trimethylsilyl) ether, ethyloxime (isomer 2)       | 865         |
| 23     | 18.092               | 3823        | 16396907  | ??                                                                       |             |
| 24     | 18.414               | 3918        | 31802242  | ??                                                                       |             |
| 25     | 19.245               | 4163        | 30676837  | ??                                                                       |             |
| 26     | 19.328               | 4187        | 63381242  | Levoglucozan, 3TMS derivative                                            | 909         |
| 27     | 19.851               | 4341        | 83337831  | D-(+)-Arabitol, 5TMS derivative                                          | 952         |
| 28     | 20.018               | 4389        | 51998322  | ??                                                                       |             |
| 29     | 20.988               | 4675        | 24008368  | Acetamide, N-[4-[(trimethylsilyl)oxy]phenyl]-                            | 912         |
| 30     | 21.337               | 4761        | 38771379  | Ribonic acid, pentakis-TMS                                               | 895         |
| 31     | 21.914               | 4932        | 58863278  | Ribonic acid, 2,3,4,5-tetrakis-O-(trimethylsilyl)-, trimethylsilyl ester | 894         |
| 32     | 22.376               | 5084        | 41495715  | ??                                                                       |             |
| 33     | 23                   | 5268        | 25663948  | D-(-)-Fructofuranose, pentakis(trimethylsilyl) ether (isomer 2)          | 769         |

| Peak # | Retention Time (min) | Scan Number | Peak Area  | Tentative Identification                                                  | Match Score |
|--------|----------------------|-------------|------------|---------------------------------------------------------------------------|-------------|
| 35     | 24.211               | 5622        | 536431138  | Glycine, N-benzoyl-, trimethylsilyl ester                                 | 923         |
| 36     | 24.279               | 5642        | 51155480   | ??                                                                        |             |
| 37     | 24.533               | 5718        | 214862863  | L-3-Methylhistidine, 2TMS derivative                                      | 788         |
| 38     | 24.876               | 5821        | 242765093  | D-(-)-Fructose, pentakis(trimethylsilyl) ether, methyloxime (anti)        | 839         |
| 39     | 25.742               | 6035        | 4696478735 | d-Galactose, 2,3,4,5,6-pentakis-O-(trimethylsilyl)-, o-methyloxyme, (1E)- | 896         |
| 40     | 26.398               | 6265        | 45004415   | ??                                                                        |             |
| 41     | 26.553               | 6290        | 1886733813 | d-Galactose, 2,3,4,5,6-pentakis-O-(trimethylsilyl)-, o-methyloxyme, (1Z)- | 939         |
| 42     | 26.888               | 6409        | 261589473  | D-Mannitol, 6TMS derivative                                               | 953         |
| 43     | 27.049               | 6457        | 207411055  | ??                                                                        |             |
| 44     | 27.185               | 6494        | 28115442   | Galactitol, 6TMS derivative                                               | 876         |
| 45     | 27.249               | 6516        | 27677492   | L-Tyrosine, 3TMS derivative                                               | 932         |
| 46     | 27.465               | 6581        | 41918542   | Galactaric acid, 6TMS derivative                                          | 871         |
| 47     | 27.743               | 6648        | 369540621  | ??                                                                        |             |
| 48     | 27.862               | 6696        | 20317139   | ??                                                                        |             |
| 49     | 27.956               | 6723        | 43418188   | ??                                                                        |             |
| 50     | 28.188               | 6792        | 21296389   | ??                                                                        |             |
| 51     | 28.482               | 6885        | 1224387919 | $\beta$ -D-Glucopyranose, 5TMS derivative                                 | 938         |
| 52     | 28.87                | 6992        | 72964634   | ??                                                                        |             |
| 53     | 28.984               | 7025        | 120313758  | D-Gluconic acid, 6TMS derivative                                          | 963         |
| 54     | 29.333               | 7128        | 59661956   | ??                                                                        |             |
| 55     | 29.584               | 7203        | 20770238   | ??                                                                        |             |
| 56     | 29.794               | 7263        | 18493181   | Scyllo-Inositol, 6TMS derivative                                          | 893         |
| 57     | 29.922               | 7302        | 240647691  | ??                                                                        |             |
| 58     | 30.12                | 7360        | 20062875   | 7-Methylxanthine, 2TMS derivative                                         | 898         |
| 59     | 31.119               | 7653        | 168406311  | 2-Hydroxyhippuric acid, 2TMS derivative                                   | 959         |
| 60     | 31.702               | 7823        | 89604873   | Myo-Inositol, 6TMS derivative                                             | 943         |
| 61     | 32.162               | 7941        | 379433541  | Uric acid, N,O,O',O''-tetrakis(trimethylsilyl)-                           | 843         |
| 62     | 32.292               | 7999        | 23289795   | D-(+)-Galactose, pentakis(trimethylsilyl) ether, ethyloxime (isomer 1)    | 815         |
| 63     | 33.525               | 8360        | 42252639   | m-Trimethylsilyloxy(trimethylsilyl)hippurate                              | 903         |
| 64     | 35.264               | 8871        | 16923707   | ??                                                                        |             |
| 65     | 35.821               | 9035        | 16688197   | Glycine, N-[4-[(trimethylsilyl)oxy]benzoyl]-, trimethylsilyl ester        | 953         |
| 66     | 38.87                | 9931        | 93164151   | D-(-)-Ribofuranose, tetrakis(trimethylsilyl) ether (isomer 2)             | 880         |
| 67     | 40.43                | 10390       | 19179580   | D-(-)-Ribofuranose, tetrakis(trimethylsilyl) ether (isomer 1)             | 853         |

| Peak # | Retention Time (min) | Scan Number | Peak Area | Tentative Identification                                                                                         | Match Score |
|--------|----------------------|-------------|-----------|------------------------------------------------------------------------------------------------------------------|-------------|
| 68     | 41.323               | 10644/10655 | 47648974  | Edetic Acid, 4TMS derivative/Tp-Tolyl- $\beta$ -D-glucuronide, tris(trimethylsilyl) ether, trimethylsilyl ester  | 911/865     |
| 69     | 42.522               | 11006       | 65960197  | ??                                                                                                               |             |
| 70     | 55.394               | 14789       | 214499577 | $\beta$ -d-Glucopyranosiduronic acid, 4-(acetylamino)phenyl 2,3,4-tris-O-(trimethylsilyl)-, trimethylsilyl ester | 888         |
| 71     | 56.201               | 15029       | 17134101  | ??                                                                                                               |             |

Table S5. Tentative Peak Identifications for GC/MS of Candidate SRM 3674 Non-Smoker's Urine

| Peak # | Retention Time (min) | Scan Number | Peak Area | Tentative Identification                                                          | Match Score |
|--------|----------------------|-------------|-----------|-----------------------------------------------------------------------------------|-------------|
| 1      | 7.958                | 844         | 72457683  | Glycine, 3TMS derivative                                                          | 919         |
| 2      | 8.049                | 870         | 30937070  | Butanedioic acid, 2TMS derivative                                                 | 949         |
| 3      | 8.286                | 940         | 88001111  | Glyceric acid, 3TMS derivative                                                    | 963         |
| 4      | 8.572                | 1025        | 36493267  | (R*,R*)-2,3-Dihydroxybutanoic acid, tris(trimethylsilyl)-                         | 945         |
| 5      | 8.786                | 1087        | 64083340  | (R*,R*)-2,3-Dihydroxybutanoic acid, tris(trimethylsilyl)-                         | 959         |
| 6      | 8.985                | 1146        | 15559748  | Serine, 3TMS derivative                                                           | 910         |
| 7      | 10.219               | 1510        | 23102733  | {4-Methoxy-2-[(trimethylsilyl)oxy]phenyl}{2-[(trimethylsilyl)oxy]phenyl}methanone | 704         |
| 8      | 10.291               | 1530        | 24362591  | Butanoic acid, 2,4-bis[(trimethylsilyl)oxy]-, trimethylsilyl ester                | 929         |
| 9      | 10.828               | 1688        | 47083995  | (R*,S*)-3,4-DIHYDROXYBUTANOIC ACID TRITMS                                         | 931         |
| 10     | 11.122               | 1773        | 23930824  | ??                                                                                |             |
| 11     | 11.97                | 2023        | 35507121  | Aminomalonic acid, tris(trimethylsilyl)-                                          | 929         |
| 12     | 12.728               | 2246        | 42697039  | L-Threitol, 4TMS derivative                                                       | 938         |
| 13     | 12.983               | 2321        | 179637927 | meso-Erythritol, 4TMS derivative                                                  | 934         |
| 14     | 13.269               | 2405        | 33578018  | Salicylic acid, 2TMS derivative                                                   | 917         |
| 15     | 13.618               | 2508        | 72623758  | L-5-Oxoproline, , 2TMS derivative                                                 | 944         |
| 16     | 13.862               | 2580        | 16891928  | ??                                                                                |             |
| 17     | 14.095               | 2648        | 153847356 | L-Threonic acid, tris(trimethylsilyl) ether, trimethylsilyl ester                 | 937         |
| 18     | 14.391               | 2735        | 25369635  | ??                                                                                |             |
| 19     | 14.617               | 2801        | 144652887 | L-Threonic acid, tris(trimethylsilyl) ether, trimethylsilyl ester                 | 936         |
| 20     | 15.185               | 2970        | 21491576  | Pentanedioic acid, 2-[(trimethylsilyl)oxy]-, bis(trimethylsilyl) ester            | 949         |
| 21     | 15.656               | 3107        | 97968841  | 1,2-Dithiane-4,5-diol, (Z)-, 2TMS derivative                                      | 944         |
| 22     | 16.497               | 3354        | 20389793  | ??                                                                                |             |
| 23     | 17.131               | 3541        | 39936084  | Tartaric acid, 4TMS derivative                                                    | 913         |
| 24     | 17.383               | 3615        | 33586853  | 4-Hydroxybenzeneacetic acid, 2TMS derivative                                      | 915         |
| 25     | 17.518               | 3661        | 23014572  | ??                                                                                |             |
| 26     | 17.734               | 3718        | 42192606  | D-Arabinose, tetrakis(trimethylsilyl) ether, ethyloxime (isomer 2)                | 877         |
| 27     | 17.851               | 3752        | 74747275  | 3,4,5-Trihydroxypentanoic acid, tetrakis(trimethylsilyl)-                         | 921         |
| 28     | 17.973               | 3789        | 81119126  | ??                                                                                |             |
| 29     | 18.431               | 3934        | 51564707  | ??                                                                                |             |
| 30     | 19.265               | 4167        | 32252574  | ??                                                                                |             |
| 31     | 19.349               | 4192        | 83062427  | Levogluconan, 3TMS derivative                                                     | 917         |

| Peak # | Retention Time (min) | Scan Number | Peak Area  | Tentative Identification                                                | Match Score |
|--------|----------------------|-------------|------------|-------------------------------------------------------------------------|-------------|
| 33     | 20.037               | 4396        | 76476301   | L-(-)-Fucose, tetrakis(trimethylsilyl) ether, methyloxime (syn)         | 836         |
| 34     | 20.464               | 4518        | 32357997   | L-(-)-Fucose, tetrakis(trimethylsilyl) ether, methyloxime (anti)        | 845         |
| 35     | 20.98                | 4673        | 64148048   | Aconitic acid, (Z)-, 3TMS derivative                                    | 919         |
| 36     | 21.361               | 4786        | 69420099   | 2-Keto-l-gluconic acid, penta(O-trimethylsilyl)-                        | 844         |
| 37     | 21.934               | 4953        | 94598865   | ??                                                                      |             |
| 38     | 22.418               | 5094        | 39745006   | ??                                                                      |             |
| 39     | 23.026               | 5273        | 38936832   | ??                                                                      |             |
| 40     | 23.327               | 5326        | 916159906  | Citric acid, 4TMS derivative                                            | 928         |
| 41     | 24.261               | 5633        | 701634267  | Hippuric acid, TMS derivative                                           | 903         |
| 42     | 24.343               | 5664        | 37896714   | 3-(3-Hydroxyphenyl)-3-hydroxypropionic acid, tris-(O-trimethylsilyl)-   | 784         |
| 43     | 24.466               | 5697        | 79845865   | ??                                                                      |             |
| 44     | 24.576               | 5730        | 185640286  | L-3-Methylhistidine, 2TMS derivative                                    | 859         |
| 45     | 24.878               | 5821        | 264489912  | D-(-)-Fructose, pentakis(trimethylsilyl) ether, methyloxime (anti)      | 848         |
| 46     | 25.399               | 5959        | 133773030  | ??                                                                      |             |
| 47     | 25.742               | 6077        | 4962078969 | d-Glucose, 2,3,4,5,6-pentakis-O-(trimethylsilyl)-, o-methyloxyme, (1E)- | 932         |
| 48     | 26.62                | 6331        | 2091278059 | d-Glucose, 2,3,4,5,6-pentakis-O-(trimethylsilyl)-, o-methyloxyme, (1Z)- | 946         |
| 49     | 26.963               | 6431        | 332120697  | D-Mannitol, 6TMS derivative                                             | 948         |
| 50     | 27.116               | 6476        | 271948687  | ??                                                                      |             |
| 51     | 27.239               | 6512        | 35036287   | Galactitol, 6TMS derivative                                             | 882         |
| 52     | 27.307               | 6532        | 36063877   | L-Tyrosine, 3TMS derivative                                             | 918         |
| 53     | 27.518               | 6595        | 65112020   | Galactaric acid, 6TMS derivative                                        | 871         |
| 54     | 27.627               | 6627        | 19343682   | Scyllo-Inositol, 6TMS derivative                                        | 827         |
| 55     | 27.782               | 6673        | 382331055  | ??                                                                      |             |
| 56     | 27.903               | 6707        | 30517555   | D-Gluconic acid, 6TMS derivative                                        | 880         |
| 57     | 27.992               | 6734        | 61593415   | D-Gluconic acid, 6TMS derivative                                        | 922         |
| 58     | 28.522               | 6855        | 1485368919 | D-Glucose, 5TMS derivative                                              | 900         |
| 59     | 28.848               | 6985        | 59534800   | ??                                                                      |             |
| 60     | 28.91                | 7004        | 55257198   | ??                                                                      |             |
| 61     | 29.026               | 7038        | 185922274  | D-Gluconic acid, 6TMS derivative                                        | 950         |
| 62     | 29.347               | 7132        | 65972094   | ??                                                                      |             |
| 63     | 29.625               | 7213        | 32289504   | 7-(Trimethylsilyl)-2,6-bis[(trimethylsilyl)oxy]-7H-purine               | 856         |

| Peak # | Retention Time (min) | Scan Number | Peak Area | Tentative Identification                                                                  | Match Score |
|--------|----------------------|-------------|-----------|-------------------------------------------------------------------------------------------|-------------|
| 64     | 29.814               | 7267        | 43255882  | Scyllo-Inositol, 6TMS derivative                                                          | 776         |
| 65     | 29.993               | 7321        | 735331020 | ??                                                                                        |             |
| 66     | 30.157               | 7371        | 28330470  | 7-Methylxanthine, 2TMS derivative                                                         | 898         |
| 67     | 31.16                | 7371        | 227331367 | 7-Methylxanthine, 2TMS derivative                                                         | 903         |
| 68     | 31.352               | 7723        | 17261599  | N-Acetyl-D-glucosamine, tetrakis(trimethylsilyl) ether, methyloxime (syn)                 | 837         |
| 69     | 31.654               | 7810        | 69050004  | ??                                                                                        |             |
| 70     | 31.73                | 7832        | 81588506  | Myo-Inositol, 6TMS derivative                                                             | 875         |
| 71     | 32.189               | 7950        | 429260111 | Uric acid, N,O,O',O"-tetrakis(trimethylsilyl)-                                            | 845         |
| 72     | 32.316               | 8005        | 24824586  | D-(+)-Talose, pentakis(trimethylsilyl) ether, ethyloxime (isomer 2)                       | 797         |
| 73     | 33.545               | 8366        | 49031913  | m-Trimethylsilyloxy(trimethylsilyl)hippurate                                              | 903         |
| 74     | 35.283               | 8878        | 20721163  | ??                                                                                        |             |
| 75     | 35.839               | 9040        | 24224356  | Glycine, N-[4-[(trimethylsilyl)oxy]benzoyl]-, trimethylsilyl ester                        | 961         |
| 76     | 38.887               | 9936        | 135698825 | Pseudo uridine penta-tms                                                                  | 826         |
| 77     | 40.446               | 10395       | 23907632  | D-(-)-Ribofuranose, tetrakis(trimethylsilyl) ether (isomer 1)                             | 858         |
| 78     | 41.342               | 10661       | 62291699  | ??                                                                                        |             |
| 79     | 42.536               | 11007       | 68512023  | ??                                                                                        |             |
| 80     | 55.416               | 14796       | 256449650 | ??                                                                                        |             |
| 81     | 56.219               | 15032       | 24688154  | 4-Nitrophenyl- $\beta$ -D-galacturonide, tris(trimethylsilyl) ether, trimethylsilyl ester | 789         |
| 82     | 56.368               | 15076       | 15357418  | Octaethylene glycol, 2TMS derivative                                                      | 910         |

Table S6. Tentative Peak Identifications for GC/MS of SRM 3671, Level 1, Non-Smoker's Urine

| Peak # | Retention Time (min) | Peak Area | Scan Number | Tentative Identification                                           | Match Score |
|--------|----------------------|-----------|-------------|--------------------------------------------------------------------|-------------|
| 1      | 7.944                | 24289220  | 840         | Glycine, 3TMS derivative                                           | 907         |
| 2      | 8.036                | 29631789  | 867         | Succinic acid (2TMS)                                               | 949         |
| 3      | 8.276                | 22119084  | 937         | Glyceric acid, 3TMS derivative                                     | 947         |
| 4      | 8.568                | 31403463  | 1023        | (R*,R*)-2,3-Dihydroxybutanoic acid, tris(trimethylsilyl)-          | 958         |
| 5      | 8.782                | 49756951  | 1086        | R*,R*)-2,3-Dihydroxybutanoic acid, tris(trimethylsilyl)-           | 959         |
| 6      | 8.988                | 24534126  | 1146        | Serine, 3TMS derivative                                            | 939         |
| 7      | 9.616                | 19947364  | 1331        | L-Threonine, 3TMS derivative                                       | 931         |
| 8      | 10.299               | 43592176  | 1532        | Butanoic acid, 2,4-bis[(trimethylsilyl)oxy]-, trimethylsilyl ester | 909         |
| 9      | 10.613               | 22926148  | 1625        | ??                                                                 |             |
| 10     | 10.793               | 46399037  | 1678        | Oxalic acid, 2TMS derivative                                       | 874         |
| 11     | 10.839               | 36369313  | 1691        | R*,S*)-3,4-Dihydroxybutanoic acid, tris(trimethylsilyl)-           | 907         |
| 12     | 11.138               | 15623845  | 1779        | ??                                                                 |             |
| 13     | 11.996               | 173652576 | 2023        | Aminomalonic acid, tris(trimethylsilyl)-                           | 951         |
| 14     | 12.746               | 54779999  | 2251        | L-Threitol, 4TMS derivative                                        | 931         |
| 15     | 13.006               | 180214957 | 2321        | meso-Erythritol, 4TMS derivative                                   | 949         |
| 16     | 13.057               | 23511249  | 2346        | ??                                                                 |             |
| 17     | 13.137               | 39165754  | 2366        | ??                                                                 |             |
| 18     | 13.643               | 182004804 | 2503        | L-5-Oxoproline, , 2TMS derivative                                  | 956         |
| 19     | 14.091               | 799094278 | 2615        | ??                                                                 |             |
| 20     | 14.145               | 185958192 | 2662        | L-Threonic acid, tris(trimethylsilyl) ether, trimethylsilyl ester  | 908         |
| 21     | 14.669               | 335022598 | 2805        | Creatinine - 3TMS Derivative                                       | 883         |
| 22     | 15.202               | 26344290  | 2974        | ??                                                                 |             |
| 23     | 15.68                | 98105634  | 3115        | 1,2-Dithiane-4,5-diol, (Z)-, 2TMS derivative                       | 944         |
| 24     | 16.517               | 37232236  | 3360        | ??                                                                 |             |
| 25     | 16.687               | 27305108  | 3409        | L-Glutamic acid, 3TMS derivative                                   | 883         |
| 26     | 17.159               | 28738368  | 3549        | Tartaric acid, 4TMS derivative                                     | 915         |
| 27     | 17.403               | 38700341  | 3620        | 4-Hydroxybenzeneacetic acid, 2TMS derivative                       | 948         |
| 28     | 17.554               | 20647564  | 3670        | ??                                                                 |             |
| 29     | 17.766               | 25471340  | 3727        | DL-Arabinose, tetrakis(trimethylsilyl) ether, methyloxime          | 904         |
| 30     | 17.883               | 112250069 | 3762        | 3,4,5-Trihydroxypentanoic acid, tetrakis(trimethylsilyl)-          | 937         |
| 31     | 17.989               | 52201624  | 3793        | DL-Arabinose, tetrakis(trimethylsilyl) ether, methyloxime          | 919         |
| 32     | 18.134               | 18688896  | 3835        | ??                                                                 |             |
| 33     | 18.465               | 27817722  | 3931        | ??                                                                 |             |

| Peak # | Retention Time (min) | Peak Area | Scan Number | Tentative Identification                                                  | Match Score |
|--------|----------------------|-----------|-------------|---------------------------------------------------------------------------|-------------|
| 35     | 19.365               | 80334813  | 4196        | Levoglucozan, 3TMS derivative                                             | 920         |
| 36     | 19.893               | 129856993 | 4352        | D-(+)-Arabitol, 5TMS derivative                                           | 951         |
| 37     | 20.054               | 53023619  | 4401        | ??                                                                        |             |
| 38     | 20.565               | 16146486  | 4549        | D-(-)-Lyxofuranose, tetrakis(trimethylsilyl) ether                        | 800         |
| 39     | 20.986               | 40787699  | 4674        | Aconitic acid, (Z)-, 3TMS derivative                                      | 921         |
| 40     | 21.34                | 88357262  | 4778        | 2-Keto-l-gluconic acid, penta(O-trimethylsilyl)-                          | 923         |
| 41     | 21.678               | 32509442  | 4878        | ??                                                                        |             |
| 42     | 21.921               | 38611484  | 4945        | 2-Keto-l-gluconic acid, penta(O-trimethylsilyl)-                          | 920         |
| 43     | 21.955               | 70694260  | 4961        | ??                                                                        |             |
| 44     | 22.378               | 37117388  | 5084        | ??                                                                        |             |
| 45     | 22.477               | 17363447  | 5112        | ??                                                                        |             |
| 46     | 22.801               | 40588163  | 5208        | L-3-Methylhistidine, 2TMS derivative                                      | 796         |
| 47     | 23.31                | 476966203 | 5337        | Citric acid, 4TMS derivative                                              | 940         |
| 48     | 23.367               | 60358758  | 5374        | Isocitric acid (4TMS                                                      | 823         |
| 49     | 24.002               | 15755006  | 5560        | ??                                                                        |             |
| 50     | 24.235               | 306929963 | 5611        | Glycine, N-benzoyl-, trimethylsilyl ester                                 | 931         |
| 51     | 24.309               | 50766627  | 5651        | p-Trimethylsilyloxyphenyl-<br>(trimethylsilyloxy)trimethylsilylacrylate   | 850         |
| 52     | 24.414               | 109685523 | 5682        | D-Fructose, 1,3,4,5,6-pentakis-O-(trimethylsilyl)-, O-methyloxime         | 930         |
| 53     | 24.626               | 201271438 | 5729        | L-3-Methylhistidine, 2TMS derivative                                      | 902         |
| 54     | 24.799               | 221307555 | 5787        | D-(-)-Fructose, pentakis(trimethylsilyl) ether, methyloxime               | 923         |
| 55     | 24.913               | 63051485  | 5829        | D-(-)-Fructose, pentakis(trimethylsilyl) ether, methyloxime (anti)        | 879         |
| 56     | 25.046               | 28468092  | 5867        | D-(-)-Fructose, pentakis(trimethylsilyl) ether, methyloxime (syn)         | 803         |
| 57     | 25.131               | 32725854  | 5892        | D-Allose, pentakis(trimethylsilyl) ether, methyloxime (syn)               | 810         |
| 58     | 25.227               | 53368100  | 5920        | D-(-)-Fructose, pentakis(trimethylsilyl) ether, methyloxime (syn)         | 867         |
| 59     | 25.344               | 33628704  | 5954        | ??                                                                        |             |
| 60     | 25.509               | 71292237  | 6003        | d-Galactose, 2,3,4,5,6-pentakis-O-(trimethylsilyl)-, o-methyloxime, (1E)- | 939         |
| 61     | 25.715               | 122284058 | 6064        | d-Glucose, 2,3,4,5,6-pentakis-O-(trimethylsilyl)-, o-methyloxime, (1Z)-   | 910         |
| 62     | 26.03                | 19025940  | 6157        | ??                                                                        |             |
| 63     | 26.226               | 29784895  | 6213        | d-Galactose, 2,3,4,5,6-pentakis-O-(trimethylsilyl)-, o-methyloxime, (1E)- | 856         |

| Peak # | Retention Time (min) | Peak Area | Scan Number | Tentative Identification                                           | Match Score |
|--------|----------------------|-----------|-------------|--------------------------------------------------------------------|-------------|
| 64     | 26.322               | 26009387  | 6243        | D-(+)-Talose, pentakis(trimethylsilyl) ether, methyloxime (syn)    | 786         |
| 65     | 26.507               | 114438518 | 6298        | L-Histidine, N,1-bis(trimethylsilyl)-, trimethylsilyl ester        | 901         |
| 66     | 26.792               | 466761492 | 6382        | D-Mannitol, 6TMS derivative                                        | 945         |
| 67     | 26.964               | 210418165 | 6430        | Galactaric acid, 6TMS derivative                                   | 840         |
| 68     | 27.138               | 76414765  | 6482        | L-Tyrosine, 3TMS derivative                                        | 940         |
| 69     | 27.415               | 31787350  | 6483        | Galactaric acid, 6TMS derivative                                   | 872         |
| 70     | 27.756               | 35585060  | 6665        | 13 $\beta$ -Ethyl-3-oximinogon-4-en-17-one 3-TMS                   | 848         |
| 71     | 27.835               | 17311682  | 6688        | 1H-Indole-2-acetic acid, 1-(trimethylsilyl)-, trimethylsilyl ester | 840         |
| 72     | 27.94                | 44119651  | 6719        | D-Gluconic acid, 6TMS derivative                                   | 943         |
| 73     | 28.831               | 46206266  | 6983        | D-Gluconic acid, 6TMS derivative                                   | 896         |
| 74     | 28.965               | 61607740  | 7020        | D-Gluconic acid, 6TMS derivative                                   | 960         |
| 75     | 30.119               | 25148372  | 7359        | 7-Methylxanthine, 2TMS derivative                                  | 929         |
| 76     | 31.735               | 55211193  | 7836        | Myo-Inositol, 6TMS derivative                                      | 896         |
| 77     | 32.219               | 377674945 | 7955        | Uric acid, N,O,O',O''-tetrakis(trimethylsilyl)-                    | 848         |
| 78     | 33.569               | 35452304  | 8373        | Glycine, N-[4-[(trimethylsilyl)oxy]benzoyl]-, trimethylsilyl ester | 920         |
| 79     | 34.17                | 15961475  | 8550        | ??                                                                 |             |
| 80     | 35.301               | 19897544  | 8881        | ??                                                                 |             |
| 81     | 35.443               | 37191245  | 8945        | 5-Hydroxyindoleacetic acid, 3TMS derivative                        | 930         |
| 82     | 35.879               | 26002472  | 9053        | Glycine, N-[4-[(trimethylsilyl)oxy]benzoyl]-, trimethylsilyl ester | 955         |
| 83     | 38.357               | 23396469  | 9781        | 2-O-Glycerol- $\alpha$ -d-galactopyranoside, hexa-TMS              | 971         |
| 84     | 38.955               | 166495695 | 9957        | ??                                                                 |             |
| 85     | 39.635               | 17944675  | 10157       | ??                                                                 |             |
| 86     | 40.493               | 27404033  | 100409      | D-(-)-Ribofuranose, tetrakis(trimethylsilyl) ether (isomer 2)      | 856         |
| 87     | 41.401               | 38355750  | 10676       | ??                                                                 |             |
| 88     | 42.541               | 17977869  | 11010       | ??                                                                 |             |

Table S7. Tentative Peak Identifications for GC/MS of SRM 3671, Level 2, Non-Smoker's Urine

| Peak # | Retention Time (min) | Peak Area | Scan Number | Tentative Identification                                                 | Match Score |
|--------|----------------------|-----------|-------------|--------------------------------------------------------------------------|-------------|
| 1      | 7.944                | 270504768 | 838         | Glycine, 3TMS derivative                                                 | 921         |
| 2      | 8.029                | 88444261  | 865         | Succinic acid (2TMS)                                                     | 973         |
| 3      | 8.259                | 44024603  | 933         | Glyceric acid, 3TMS derivative                                           | 942         |
| 4      | 8.77                 | 112544456 | 960         | ??                                                                       |             |
| 5      | 8.552                | 88677196  | 1019        | (R*,R*)-2,3-Dihydroxybutanoic acid, tris(trimethylsilyl)-                | 949         |
| 6      | 8.767                | 111287170 | 1082        | (R*,R*)-2,3-Dihydroxybutanoic acid, tris(trimethylsilyl)-                | 955         |
| 7      | 9.591                | 37534264  | 1325        | L-Threonine, 3TMS derivative                                             | 971         |
| 8      | 10.216               | 39352432  | 1506        | ??                                                                       |             |
| 9      | 10.27                | 58643132  | 1525        | 3-Deoxytetronic acid, tris-TMS                                           | 908         |
| 10     | 10.59                | 26781301  | 1618        | ??                                                                       |             |
| 11     | 10.778               | 53780880  | 1675        | Oxalic acid, 2TMS                                                        | 872         |
| 12     | 10.815               | 81347518  | 1685        | (R*,S*)-3,4-DIHYDROXYBUTANOIC ACID TRITMS                                | 949         |
| 13     | 11.975               | 243775224 | 2026        | Aminomalonic acid, tris(trimethylsilyl)-                                 | 949         |
| 14     | 12.716               | 105600308 | 2243        | L-Threitol, 4TMS derivative                                              | 940         |
| 15     | 12.984               | 349835374 | 2322        | meso-Erythritol, 4TMS derivative                                         | 950         |
| 16     | 13.267               | 55894699  | 2405        | Salicylic acid, 2TMS derivative                                          | 916         |
| 17     | 13.627               | 120388620 | 2511        | L-5-Oxoproline, , 2TMS derivative                                        | 957         |
| 18     | 14.391               | 28947832  | 2735        | ??                                                                       |             |
| 19     | 14.101               | 316566994 | 2651        | L-Threonic acid, tris(trimethylsilyl) ether, trimethylsilyl ester        | 942         |
| 20     | 14.603               | 233760976 | 2800        | Erythronic acid, tetrakis(trimethylsilyl) deriv                          | 911         |
| 21     | 15.175               | 59523775  | 2967        | $\alpha$ -Hydroxyglutaric acid (3TMS)                                    | 951         |
| 22     | 15.418               | 20592172  | 3037        | ??                                                                       |             |
| 23     | 15.553               | 25915859  | 3077        | ??                                                                       |             |
| 24     | 15.651               | 107725660 | 3106        | 1,2-Dithiane-4,5-diol, (Z)-, 2TMS derivative                             | 948         |
| 25     | 15.989               | 33127334  | 3206        | ??                                                                       |             |
| 26     | 16.05                | 17891112  | 3225        | $\beta$ -Hydroxy- $\beta$ -methylglutaric acid (3TMS)                    | 874         |
| 27     | 16.483               | 48251203  | 3353        | ??                                                                       |             |
| 28     | 16.658               | 80238370  | 3402        | L-Glutamic acid, 3TMS derivative                                         | 910         |
| 29     | 17.122               | 56092047  | 3540        | Tartaric acid, 4TMS derivative                                           | 887         |
| 30     | 17.377               | 98997422  | 3614        | 4-Hydroxybenzeneacetic acid, 2TMS derivative                             | 957         |
| 31     | 17.53                | 127664681 | 3659        | Gluconic acid, 2-methoxime, tetra(trimethylsilyl)-, trimethylsilyl ester | 899         |

| Peak # | Retention Time (min) | Peak Area  | Scan Number | Tentative Identification                                                | Match Score |
|--------|----------------------|------------|-------------|-------------------------------------------------------------------------|-------------|
| 33     | 17.84                | 205296351  | 3750        | 3,4,5-Trihydroxypentanoic acid, tetrakis(trimethylsilyl)-               | 917         |
| 34     | 17.947               | 135220531  | 3781        | DL-Arabinose, tetrakis(trimethylsilyl) ether, methyloxime               | 897         |
| 35     | 18.095               | 29331179   | 3823        | ??                                                                      |             |
| 36     | 18.434               | 134480301  | 3924        | ??                                                                      |             |
| 37     | 19.285               | 47736819   | 4166        | ??                                                                      |             |
| 38     | 19.353               | 237404152  | 4195        | Levoglucozan, 3TMS derivative                                           | 884         |
| 39     | 19.857               | 258016555  | 4343        | D-(+)-Arabitol, 5TMS derivative                                         | 955         |
| 40     | 20.018               | 144207908  | 4390        | ??                                                                      |             |
| 41     | 20.443               | 27815871   | 4515        | L-(-)-Fucose, tetrakis(trimethylsilyl) ether, methyloxime (anti)        | 780         |
| 42     | 20.54                | 28418168   | 4543        | D-(-)-Lyxofuranose, tetrakis(trimethylsilyl) ether                      | 824         |
| 43     | 20.955               | 42575685   | 4665        | Aconitic acid, (Z)-, 3TMS derivative                                    | 910         |
| 44     | 21.306               | 123634604  | 4770        | 2-Keto-l-gluconic acid, penta(O-trimethylsilyl)-                        | 915         |
| 45     | 21.91                | 311676144  | 4928        | Ribonic acid, pentakis-TMS                                              | 912         |
| 46     | 22.345               | 112170855  | 5073        | ??                                                                      |             |
| 47     | 23.302               | 925514696  | 5350        | Citric acid, 4TMS derivative                                            | 935         |
| 48     | 24.207               | 344079468  | 5617        | Glycine, N-benzoyl-, trimethylsilyl ester                               | 928         |
| 49     | 24.277               | 88141791   | 5642        | ??                                                                      |             |
| 50     | 24.377               | 198186422  | 5673        | D-Fructose, 1,3,4,5,6-pentakis-O-(trimethylsilyl)-, O-methyloxime       | 882         |
| 51     | 24.457               | 129460350  | 5734        | ??                                                                      |             |
| 52     | 24.589               | 177238715  | 5733        | L-3-Methylhistidine, 2TMS derivative                                    | 885         |
| 53     | 24.786               | 386347172  | 5792        | D-Psicose, pentakis(trimethylsilyl) ether, methyloxime (syn)            | 888         |
| 54     | 24.859               | 231923561  | 5814        | ??                                                                      |             |
| 55     | 25.331               | 286066115  | 5951        | Ethyl $\alpha$ -D-glucopyranoside, 4TMS derivative                      | 917         |
| 56     | 25.927               | 2613237188 | 6078        | d-Glucose, 2,3,4,5,6-pentakis-O-(trimethylsilyl)-, o-methyloxyme, (1E)- | 945         |
| 57     | 26.404               | 882187964  | 6245        | d-Glucose, 2,3,4,5,6-pentakis-O-(trimethylsilyl)-, o-methyloxyme, (1Z)- | 940         |
| 58     | 26.748               | 381317345  | 6370        | D-Mannitol, 6TMS derivative                                             | 938         |
| 59     | 26.968               | 578443595  | 6430        | ??                                                                      |             |
| 60     | 27.05                | 39077924   | 6457        | Dulcitol, 6TMS derivative                                               | 848         |
| 61     | 27.105               | 88788072   | 6487        | ??                                                                      |             |
| 62     | 27.394               | 117035455  | 6558        | ??                                                                      |             |
| 63     | 27.9                 | 124289568  | 6707        | D-Gluconic acid, 6TMS derivative                                        | 936         |

| Peak # | Retention Time (min) | Peak Area | Scan Number | Tentative Identification                                                                                         | Match Score |
|--------|----------------------|-----------|-------------|------------------------------------------------------------------------------------------------------------------|-------------|
| 64     | 28.383               | 317059158 | 6850        | D-Glucose, 5TMS derivative                                                                                       | 972         |
| 65     | 28.648               | 62513600  | 6925        | D-Glucuronic acid, 2,3,4,5-tetrakis-O-(trimethylsilyl)-, trimethylsilyl ester                                    | 892         |
| 66     | 28.981               | 658924368 | 7013        | D-Gluconic acid, 6TMS derivative                                                                                 | 950         |
| 67     | 29.275               | 56571643  | 7112        | ??                                                                                                               |             |
| 68     | 29.576               | 28953154  | 7201        | Xanthine, 3TMS derivative                                                                                        | 890         |
| 69     | 29.78                | 47119458  | 7260        | Inositol, 1,2,3,4,5,6-hexakis-O-(trimethylsilyl)-, scyllo                                                        | 864         |
| 70     | 29.886               | 36374111  | 7291        | ??                                                                                                               |             |
| 71     | 31.122               | 265559263 | 7356        | 7-Methylxanthine, 2TMS derivative                                                                                | 882         |
| 72     | 31.691               | 139425110 | 7823        | Myo-Inositol, 6TMS derivative                                                                                    | 912         |
| 73     | 32.178               | 476422053 | 7943        | Uric acid, N,O,O',O''-tetrakis(trimethylsilyl)-                                                                  | 866         |
| 74     | 32.292               | 67307710  | 8000        | D-(+)-Mannose, pentakis(trimethylsilyl) ether, ethyloxime (isomer 2)                                             | 837         |
| 75     | 33.53                | 40088296  | 8363        | m-Trimethylsilyloxy(trimethylsilyl)hippurate                                                                     | 900         |
| 76     | 35.84                | 53450153  | 9024        | D-Mannitol, 6TMS derivative                                                                                      | 941         |
| 77     | 38.896               | 305405985 | 9941        | Pseudo uridine penta-tms                                                                                         | 830         |
| 78     | 40.455               | 73000829  | 10400       | D-(-)-Ribofuranose, tetrakis(trimethylsilyl) ether (isomer 1)                                                    | 853         |
| 79     | 41.339               | 83016337  | 10658       | ??                                                                                                               |             |
| 80     | 41.839               | 28540270  | 10805       | $\beta$ -D-Glucopyranuronic acid, 5TMS derivative                                                                | 876         |
| 81     | 42.268               | 28939888  | 10930       | ??                                                                                                               |             |
| 82     | 42.528               | 75267143  | 11007       | ??                                                                                                               |             |
| 83     | 55.364               | 99219170  | 14782       | $\beta$ -d-Glucopyranosiduronic acid, 4-(acetylamino)phenyl 2,3,4-tris-O-(trimethylsilyl)-, trimethylsilyl ester | 870         |

Table S8. Tentative Peak Identifications for GC/MS of SRM 3671, Level 3, Smoker's Urine

| Peak # | Retention Time (min) | Peak Area | Scan number | Tentative Identification                                                          | Match Score |
|--------|----------------------|-----------|-------------|-----------------------------------------------------------------------------------|-------------|
| 1      | 7.951                | 93471681  | 842         | Glycine, 3TMS derivative                                                          | 921         |
| 2      | 8.041                | 52023821  | 869         | Succinic acid (2TMS)                                                              | 949         |
| 3      | 8.281                | 22367157  | 939         | Glyceric acid, 3TMS derivative                                                    | 922         |
| 4      | 8.572                | 52504781  | 1018        | (R*,R*)-2,3-Dihydroxybutanoic acid, tris(trimethylsilyl)-/Uracil, 2TMS derivative | 957/919     |
| 5      | 8.789                | 101761543 | 1089        | (R*,R*)-2,3-Dihydroxybutanoic acid, tris(trimethylsilyl)-                         | 960         |
| 6      | 8.99                 | 41010315  | 1147        | Serine, 3TMS derivative                                                           | 1147        |
| 7      | 9.616                | 31144125  | 1331        | L-Threonine, 3TMS derivative                                                      | 956         |
| 8      | 10.613               | 34348730  | 1625        | ??                                                                                |             |
| 9      | 10.792               | 36262505  | 1678        | Oxalic acid, 2TMS derivative                                                      | 866         |
| 10     | 10.84                | 52821416  | 1691        | Butanoic acid, 3,4-bis[(trimethylsilyl)oxy]-, trimethylsilyl ester                | 911         |
| 11     | 11.13                | 25372621  | 1776        | ??                                                                                |             |
| 12     | 12                   | 200912097 | 2023        | Aminomalonic acid, tris(trimethylsilyl)-                                          | 958         |
| 13     | 12.746               | 60980671  | 2252        | L-Threitol, 4TMS derivative                                                       | 940         |
| 14     | 13.013               | 250987829 | 2230        | meso-Erythritol, 4TMS derivative                                                  | 954         |
| 15     | 13.633               | 94961449  | 2512        | L-5-Oxoproline, , 2TMS derivative                                                 | 953         |
| 16     | 14.079               | 643690303 | 2624        | ??                                                                                |             |
| 17     | 14.151               | 287669457 | 2665        | L-Threonic acid, tris(trimethylsilyl) ether, trimethylsilyl ester                 | 918         |
| 18     | 14.559               | 18844400  | 2784        | 5-Hydroxymethyl-2-furoic acid, 2TMS derivative                                    | 925         |
| 19     | 14.679               | 397391855 | 2828        | Creatinine - 3TMS Derivative                                                      | 872         |
| 20     | 15.21                | 43910951  | 2977        | Pentanedioic acid, 2-[(trimethylsilyl)oxy]-, bis(trimethylsilyl) ester            | 965         |
| 21     | 15.579               | 26945585  | 3083        | ??                                                                                |             |
| 22     | 15.684               | 113389475 | 3115        | 1,2-Dithiane-4,5-diol, (Z)-, 2TMS derivative                                      | 943         |
| 23     | 16.09                | 22549031  | 3234        | Pentanedioic acid, 3-methyl-3-[(trimethylsilyl)oxy]-, bis(trimethylsilyl) ester   | 862         |
| 24     | 16.524               | 41543411  | 3362        | ??                                                                                |             |
| 25     | 16.698               | 64548325  | 3414        | L-Glutamic acid, 3TMS derivative                                                  | 910         |
| 26     | 16.86                | 18307419  | 3462        | ??                                                                                |             |
| 27     | 16.924               | 27427264  | 3480        | Ibuprofen, TMS derivative                                                         | 903         |
| 28     | 17.162               | 45558132  | 3550        | Tartaric acid, 4TMS derivative                                                    | 905         |
| 29     | 17.413               | 73537543  | 3624        | 4-Hydroxybenzeneacetic acid, 2TMS derivative                                      | 959         |

| Peak # | Retention Time (min) | Peak Area | Scan number | Tentative Identification                                                  | Match Score |
|--------|----------------------|-----------|-------------|---------------------------------------------------------------------------|-------------|
| 30     | 17.56                | 39826122  | 3667        | Gluconic acid, 2-methoxime, tetra(trimethylsilyl)-, trimethylsilyl ester  | 817         |
| 31     | 17.764               | 41360394  | 3727        | D-Arabinose, tetrakis(trimethylsilyl) ether, ethyloxime (isomer 2)        | 893         |
| 32     | 17.886               | 158403088 | 3763        | 3,4,5-Trihydroxypentanoic acid, tetrakis(trimethylsilyl)-                 | 935         |
| 33     | 17.992               | 82325388  | 3794        | d-Ribose, 2,3,4,5-tetrakis-O-(trimethylsilyl)-, O-methyloxime             | 926         |
| 34     | 18.067               | 18354606  | 3816        | Furoylglycine, TMS derivative                                             | 914         |
| 35     | 18.135               | 27051084  | 3836        | ??                                                                        |             |
| 36     | 18.475               | 79848594  | 3937        | d-Ribose, 2,3,4,5-tetrakis-O-(trimethylsilyl)-, O-methyloxime             | 905         |
| 37     | 19.284               | 30100282  | 4174        | ??                                                                        |             |
| 38     | 19.379               | 131876994 | 4202        | Levoglucozan, 3TMS derivative                                             | 850         |
| 39     | 19.405               | 58376496  | 4217        | Xylitol, 5TMS derivative                                                  | 927         |
| 40     | 19.904               | 188206561 | 4355        | D-(+)-Arabitol, 5TMS derivative                                           | 953         |
| 41     | 20.061               | 99142806  | 4403        | ??                                                                        |             |
| 42     | 20.996               | 85630489  | 4678        | Aconitic acid, (E)-, 3TMS derivative                                      | 938         |
| 43     | 21.359               | 59401091  | 4785        | 2-Keto-l-gluconic acid, penta(O-trimethylsilyl)-                          | 912         |
| 44     | 21.672               | 36314041  | 4874        | Ribonic acid, 2,3,4,5-tetrakis-O-(trimethylsilyl)-, trimethylsilyl ester  | 941         |
| 45     | 21.963               | 167875465 | 4948        | Ribonic acid, 2,3,4,5-tetrakis-O-(trimethylsilyl)-, trimethylsilyl ester  | 945         |
| 46     | 22.82                | 67329044  | 5214        | 9H-Purin-6-ol, 2TMS derivative                                            | 960         |
| 47     | 22.978               | 41157260  | 5257        | D-(-)-Fructofuranose, pentakis(trimethylsilyl) ether (isomer 2)           | 892         |
| 48     | 23.044               | 37932234  | 5280        | ??                                                                        |             |
| 49     | 23.349               | 781392757 | 5338        | Citric acid, 4TMS derivative                                              | 929         |
| 50     | 24.278               | 461403554 | 5642        | Hippuric acid, TMS derivative                                             | 954         |
| 51     | 24.422               | 126281605 | 5684        | D-Fructose, 1,3,4,5,6-pentakis-O-(trimethylsilyl)-, O-methyloxime         | 896         |
| 52     | 24.496               | 74234975  | 5706        | ??                                                                        |             |
| 53     | 24.625               | 178533301 | 5737        | L-3-Methylhistidine, 2TMS derivative                                      | 871         |
| 54     | 24.8                 | 226143390 | 5796        | D-Psicose, pentakis(trimethylsilyl) ether, methyloxime (syn)              | 924         |
| 55     | 24.885               | 60056769  | 5821        | ??                                                                        |             |
| 56     | 25.346               | 193276955 | 5957        | Ethyl $\alpha$ -D-glucopyranoside, 4TMS derivative                        | 927         |
| 57     | 25.51                | 135743997 | 6004        | ??                                                                        |             |
| 58     | 25.718               | 77840434  | 6065        | d-Galactose, 2,3,4,5,6-pentakis-O-(trimethylsilyl)-, o-methyloxime, (1Z)- | 878         |
| 59     | 26.223               | 41565900  | 6213        | d-Galactose, 2,3,4,5,6-pentakis-O-(trimethylsilyl)-, o-methyloxime, (1E)- | 845         |

| Peak # | Retention Time (min) | Peak Area | Scan number | Tentative Identification                                                      | Match Score |
|--------|----------------------|-----------|-------------|-------------------------------------------------------------------------------|-------------|
| 60     | 26.513               | 120376678 | 6300        | L-Histidine, N,1-bis(trimethylsilyl)-, trimethylsilyl ester                   | 900         |
| 61     | 26.768               | 243676160 | 6374        | D-Mannitol, 6TMS derivative                                                   | 954         |
| 62     | 26.976               | 372274773 | 6436        | Galactaric acid, 6TMS derivative                                              | 835         |
| 63     | 27.157               | 84917267  | 6489        | L-Tyrosine, 3TMS derivative                                                   | 895         |
| 64     | 27.421               | 62069527  | 6566        | Galactaric acid, 6TMS derivative                                              | 889         |
| 65     | 27.78                | 81052023  | 6671        | ??                                                                            |             |
| 66     | 27.84                | 34715309  | 6691        | 3-Indoleacetic acid, 2TMS derivative                                          | 879         |
| 67     | 27.949               | 80980535  | 6721        | D-Gluconic acid, 6TMS derivative                                              | 955         |
| 68     | 28.663               | 74537353  | 6931        | D-(+)-Galacturonic acid, 5TMS derivative                                      | 859         |
| 69     | 28.847               | 50926506  | 6985        | ??                                                                            |             |
| 70     | 28.973               | 101998406 | 7022        | D-Gluconic acid, 6TMS derivative                                              | 967         |
| 71     | 29.306               | 45077160  | 7119        | ??                                                                            |             |
| 72     | 29.612               | 21057973  | 7212        | 7-(Trimethylsilyl)-2,6-bis[(trimethylsilyl)oxy]-7H-purine                     | 878         |
| 73     | 29.733               | 21584340  | 7245        | D-Glucuronic acid, 2,3,4,5-tetrakis-O-(trimethylsilyl)-, trimethylsilyl ester | 948         |
| 74     | 29.825               | 16631956  | 7274        | Scyllo-Inositol, 6TMS derivative                                              | 840         |
| 75     | 30.129               | 32461967  | 7361        | 7-Methylxanthine, 2TMS derivative                                             | 880         |
| 76     | 31.098               | 39892575  | 7647        | 2-Hydroxyhippuric acid, 2TMS derivative                                       | 903         |
| 77     | 31.378               | 18475004  | 7330        | N-Acetyl-D-glucosamine, tetrakis(trimethylsilyl) ether, methyloxime (syn      | 831         |
| 78     | 31.741               | 34445585  | 7836        | Myo-Inositol, 6TMS derivative                                                 | 912         |
| 79     | 32.221               | 395731504 | 7954        | Uric acid, N,O,O',O''-tetrakis(trimethylsilyl)-                               | 855         |
| 80     | 35.32                | 39119081  | 8889        | ??                                                                            |             |
| 81     | 35.44                | 31763700  | 8922        | L-Tryptophan, 3TMS derivative                                                 | 891         |
| 82     | 35.51                | 9068432   | 8945        | 5-Hydroxyindoleacetic acid, 3TMS derivative                                   | 885         |
| 83     | 35.887               | 37451915  | 9055        | Glycine, N-[4-[(trimethylsilyl)oxy]benzoyl]-, trimethylsilyl ester            | 963         |
| 84     | 38.075               | 36879140  | 9699        | Benzoylecgonine-TMS                                                           | 915         |
| 85     | 38.96                | 244122148 | 9959        | Arabinofuranose, 1,2,3,5-tetrakis-O-(trimethylsilyl)-                         | 909         |
| 86     | 40.504               | 53140305  | 10412       | D-(-)-Ribofuranose, tetrakis(trimethylsilyl) ether (isomer 1)                 | 855         |
| 87     | 41.406               | 84042963  | 10679       | Edetic Acid, 4TMS derivative                                                  | 839         |
| 88     | 41.912               | 30102007  | 10828       | ??                                                                            |             |
| 89     | 42.338               | 24978891  | 10953       | ??                                                                            |             |
| 90     | 42.597               | 65100604  | 11031       | ??                                                                            |             |

| Peak # | Retention Time (min) | Peak Area | Scan number | Tentative Identification                                                                                         | Match Score |
|--------|----------------------|-----------|-------------|------------------------------------------------------------------------------------------------------------------|-------------|
| 91     | 43.261               | 36320324  | 11222       | ??                                                                                                               |             |
| 92     | 55.43                | 59806327  | 14801       | $\beta$ -d-Glucopyranosiduronic acid, 4-(acetylamino)phenyl 2,3,4-tris-O-(trimethylsilyl)-, trimethylsilyl ester | 876         |
